# Supplementary material for: Head-to-head comparison of clustering methods for heterogeneous data: a simulation-driven benchmark
Source: Springer Nature journal article supplement (doi:10.1038/s41598-021-83340-8), 2021-02-18
Supplement: MOESM1 [file 41598_2021_83340_MOESM1_ESM.pdf]

# Head-to-head comparison of clustering methods for heterogeneous data

## *A simulation-driven benchmark*

### ***SUPPLEMENTARY FIGURES AND TABLE***

**Supplementary Figure 1: Introduction of controlled noise in a simulated categorical variable with three levels (A: pink, B: green and C: blue) as performed in the present analysis (left panel: 0% noise, right panel: 20% noise).**

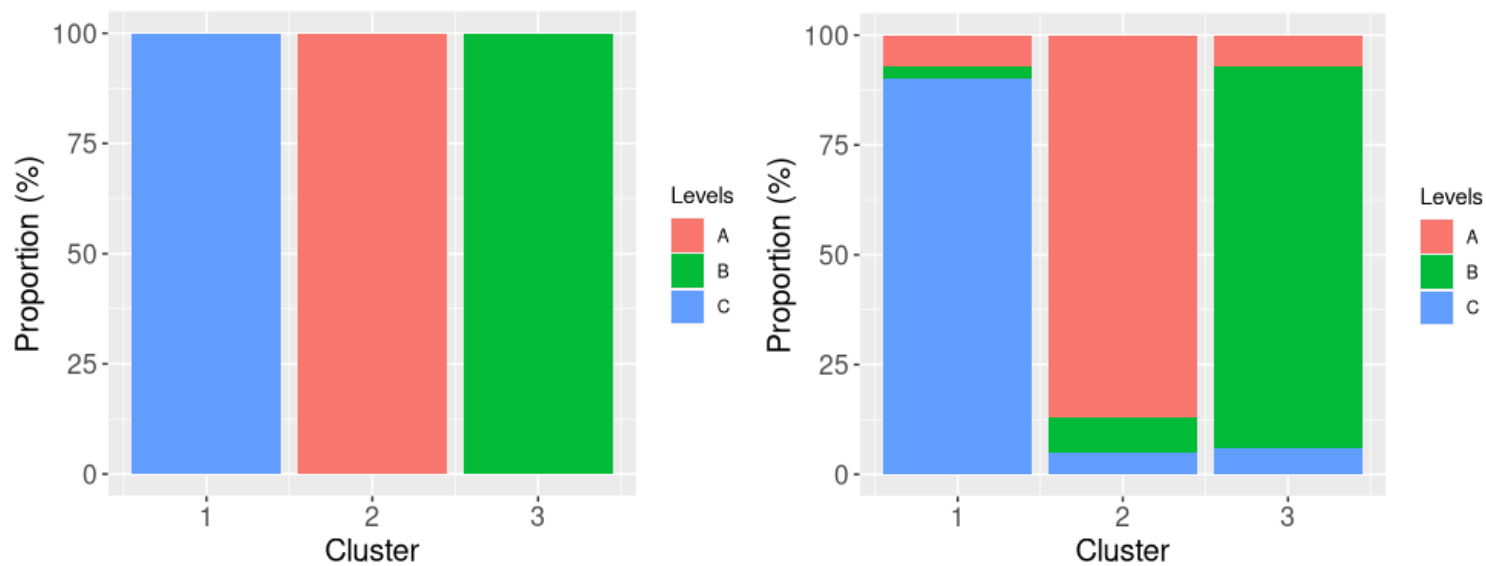

**Supplementary figure 2: 2D projections of numerical variables for datasets created from the simulation scenarios using t-SNE.**

Cluster memberships are denoted by their color.

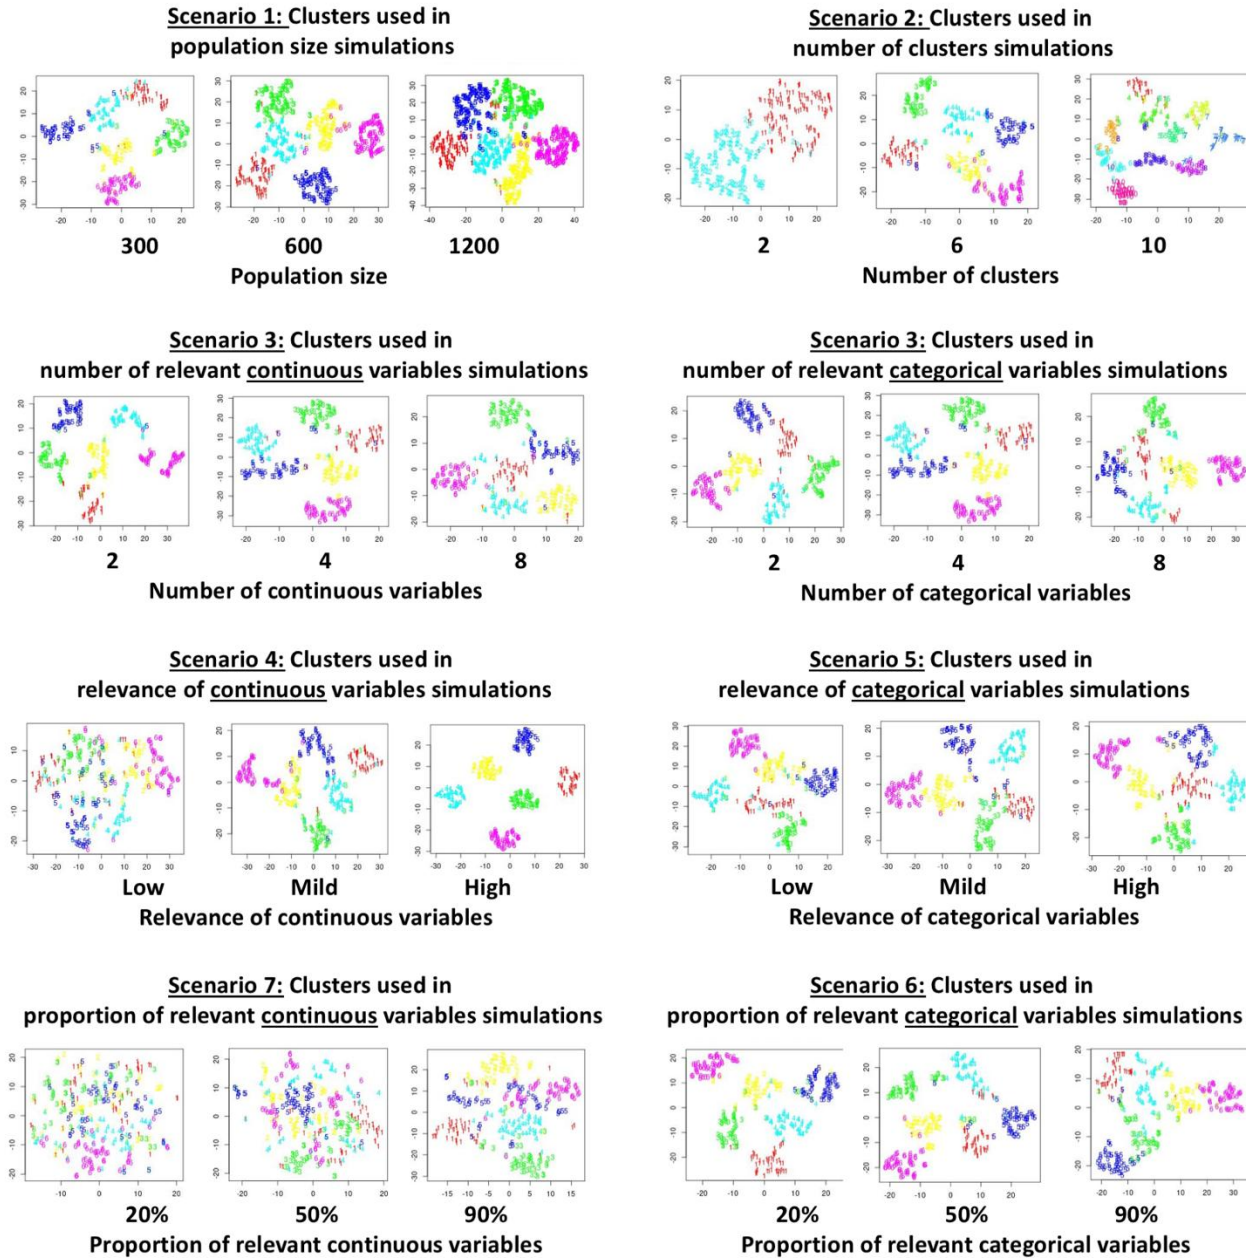

**Supplementary table 1: Comparison of methods using ARI metric for each condition presented in figures 1 and 2**

| Figure | Condition                                |      | Overall comparison* | Comparison among distance-based methods* | Comparison among model-based methods* | Comparison model-based vs. distance-based** |
|--------|------------------------------------------|------|---------------------|------------------------------------------|---------------------------------------|---------------------------------------------|
| 1      | Population size                          | 300  | <0.0001             | <0.0001                                  | <0.0001                               | <0.0001                                     |
| 1      |                                          | 600  | <0.0001             | <0.0001                                  | <0.0001                               | <0.0001                                     |
| 1      |                                          | 1200 | <0.0001             | <0.0001                                  | <0.0001                               | <0.0001                                     |
| 1      | Number of clusters                       | 2    | <0.0001             | <0.0001                                  | <0.0001                               | <0.0001                                     |
| 1      |                                          | 4    | <0.0001             | <0.0001                                  | <0.0001                               | <0.0001                                     |
| 1      |                                          | 6    | <0.0001             | <0.0001                                  | <0.0001                               | <0.0001                                     |
| 2      | Number of continuous variables           | 2    | <0.0001             | <0.0001                                  | <0.0001                               | <0.0001                                     |
| 2      |                                          | 4    | <0.0001             | <0.0001                                  | <0.0001                               | <0.0001                                     |
| 2      |                                          | 6    | <0.0001             | <0.0001                                  | <0.0001                               | <0.0001                                     |
| 2      | Number of categorical variables          | 2    | <0.0001             | <0.0001                                  | <0.0001                               | <0.0001                                     |
| 2      |                                          | 4    | <0.0001             | <0.0001                                  | <0.0001                               | <0.0001                                     |
| 2      |                                          | 6    | <0.0001             | <0.0001                                  | <0.0001                               | <0.0001                                     |
| 2      | Relevance of continuous variables        | low  | <0.0001             | <0.0001                                  | <0.0001                               | <0.0001                                     |
| 2      |                                          | mild | <0.0001             | <0.0001                                  | <0.0001                               | <0.0001                                     |
| 2      |                                          | high | <0.0001             | <0.0001                                  | <0.0001                               | <0.0001                                     |
| 2      | Relevance of categorical variables       | low  | <0.0001             | <0.0001                                  | <0.0001                               | <0.0001                                     |
| 2      |                                          | mild | <0.0001             | <0.0001                                  | <0.0001                               | <0.0001                                     |
| 2      |                                          | high | <0.0001             | <0.0001                                  | <0.0001                               | <0.0001                                     |
| 2      | Number of relevant continuous variables  | 2/10 | <0.0001             | <0.0001                                  | <0.0001                               | <0.0001                                     |
| 2      |                                          | 5/10 | <0.0001             | <0.0001                                  | <0.0001                               | <0.0001                                     |
| 2      |                                          | 9/10 | <0.0001             | <0.0001                                  | <0.0001                               | <0.0001                                     |
| 2      | Number of relevant categorical variables | 2/10 | <0.0001             | <0.0001                                  | <0.0001                               | <0.0001                                     |
| 2      |                                          | 5/10 | <0.0001             | <0.0001                                  | <0.0001                               | <0.0001                                     |
| 2      |                                          | 9/10 | <0.0001             | <0.0001                                  | <0.0001                               | <0.0001                                     |

\*p-value from Kruskal-Wallis test. \*\*p-value from Wilcoxon test.

**Supplementary table 2: Runtimes of the examined method for the conditions presented in figure 1 (average runtimes are presented in seconds).**

Experiments were run on a computer with an Intel i7-4600U processor running at 2.10 GHz (x4) using 11.1 GiB of RAM, running Linux: Ubuntu 20.04 LTS.

| <b>Methods</b>   | <b>Population size</b> |            |             | <b>Number of clusters</b> |          |           |
|------------------|------------------------|------------|-------------|---------------------------|----------|-----------|
|                  | <b>300</b>             | <b>600</b> | <b>1200</b> | <b>2</b>                  | <b>6</b> | <b>10</b> |
| <b>HC+Tradi</b>  | 0.021                  | 0.089      | 0.433       | 0.024                     | 0.030    | 0.021     |
| <b>HC+UET</b>    | 0.633                  | 2.292      | 7.715       | 0.753                     | 0.841    | 0.785     |
| <b>Kproto</b>    | 5.846                  | 9.696      | 13.805      | 1.338                     | 5.941    | 9.612     |
| <b>PAM+Tradi</b> | 0.071                  | 0.407      | 1.524       | 0.040                     | 0.080    | 0.107     |
| <b>PAM+UET</b>   | 0.662                  | 2.420      | 8.602       | 0.759                     | 0.875    | 0.864     |
| <b>Kamila</b>    | 0.715                  | 1.065      | 1.443       | 0.327                     | 0.837    | 0.724     |
| <b>LCA</b>       | 3.611                  | 11.437     | 19.894      | 0.947                     | 4.201    | 7.778     |
| <b>LCM</b>       | 4.564                  | 7.863      | 14.318      | 0.891                     | 4.438    | 10.161    |
| <b>Mixmod</b>    | 0.265                  | 0.167      | 0.309       | 0.182                     | 0.080    | 0.177     |
